# Supplementary material
Source: HighWire-hosted journal article supplement (https://rc.rcjournal.com/highwire/filestream/16370/field_highwire_adjunct_files/0/suppl.pdf)
Supplement: suppl.pdf [file suppl.pdf]

Supplementary material: Definition of the complications analyzed

|                                               |                                                                                                                                                            |
|-----------------------------------------------|------------------------------------------------------------------------------------------------------------------------------------------------------------|
| Reoperation                                   | Patient returned to the operating room for any reason                                                                                                      |
| Reoperation for bleeding or cardiac tamponade | Patient returned to the operating room for mediastinal bleeding/tamponade.                                                                                 |
| Perioperative MI                              | Development of new Q waves on surface ECG in at least two contiguous leads in the first 24 hours with elevation greater than 5 times upper limit of CK-MB. |
| Mediastinitis                                 | Deep wound infection that affects sternal bone, muscle and / or mediastinum and requires antibiotic treatment and / or surgical debridement.               |
| Severe sepsis /septic shock                   | Systemic inflammatory response syndrome (SIRS) criteria, with positive cultures and / or need for vasoactive drugs.                                        |
| Prolonged mechanical ventilation.             | Need for invasive mechanical ventilation longer than 24 hours after surgery                                                                                |
| Pneumonia                                     | Positive culture of respiratory sample obtained by sterile technique (BAL, tracheal aspirate) and / or appearance of new radiographic infiltrates          |
| Atrial fibrillation                           | Development of new atrial fibrillation requiring treatment for control. Excludes previous AF recurrence.                                                   |
| Renal failure                                 | Worsening of preoperative renal function requiring the use of renal replacement therapy (hemodialysis or hemofiltration).                                  |
| Stroke                                        | New abrupt onset neurological deficit that is not resolved within 24 h.                                                                                    |
| Heart Block                                   | Development of new atrioventricular conduction block requiring permanent ventricular pacemaker implantation                                                |
| Cardiac Arrest                                | Ventricular arrhythmias (VF or pulseless VT) or asystole.                                                                                                  |
| Cardiac Taponade                              | Pericardial effusion with clinically and/ or echocardiographically compromised right heart filling that does not require surgery.                          |
| Multiple organ failure                        | Two or more major organ systems suffer compromised functions (neurological, renal, pulmonary, cardiac or vascular)                                         |
